# Supplementary material for: Muscle calcium stress cleaves junctophilin1, unleashing a gene regulatory program predicted to correct glucose dysregulation
Source: eLife journal article supplement (doi:10.7554/elife.78874), 2023-01-16

Normalizing ponceau stain whole blot for JPh1 blot for figure 1A

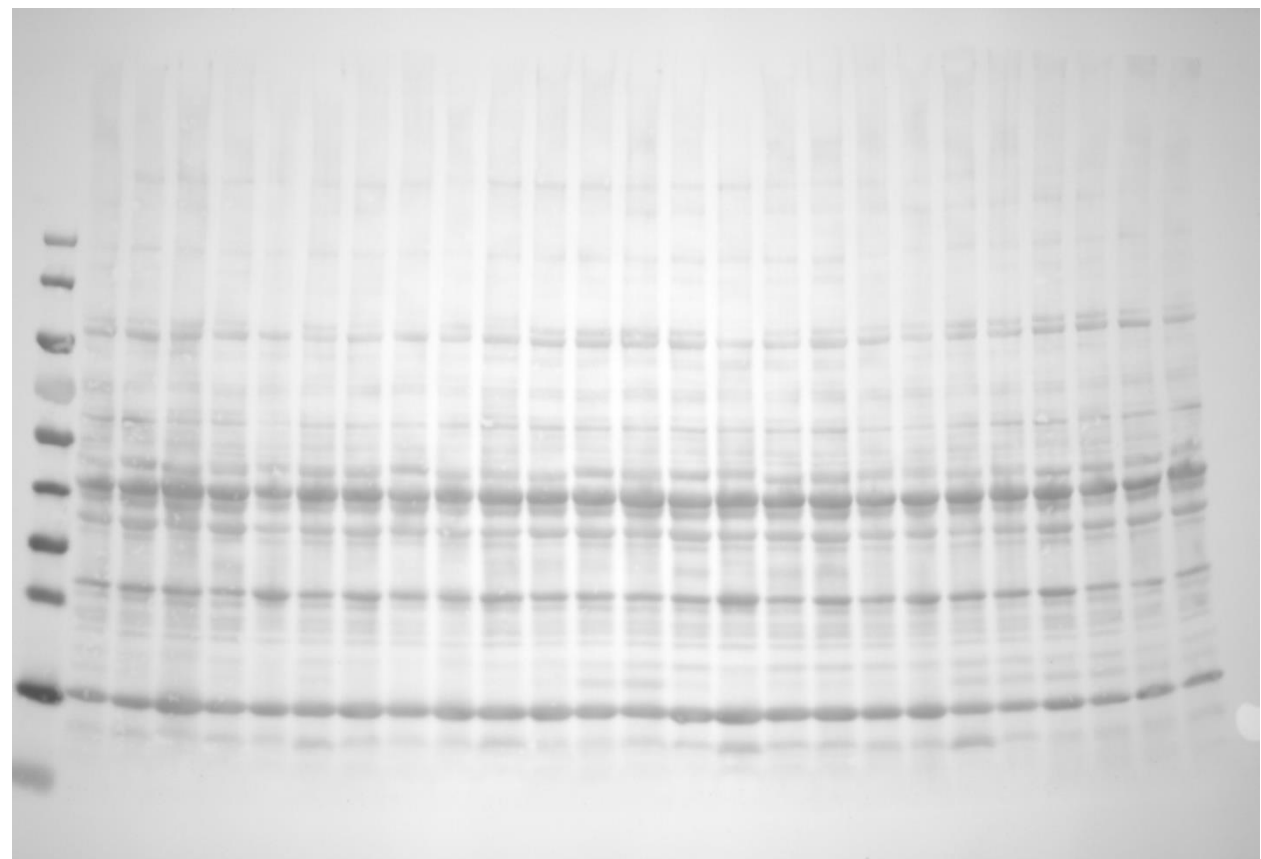

**Figure 1-source data 3:** JPh44 raw blot shown in Fig 1B

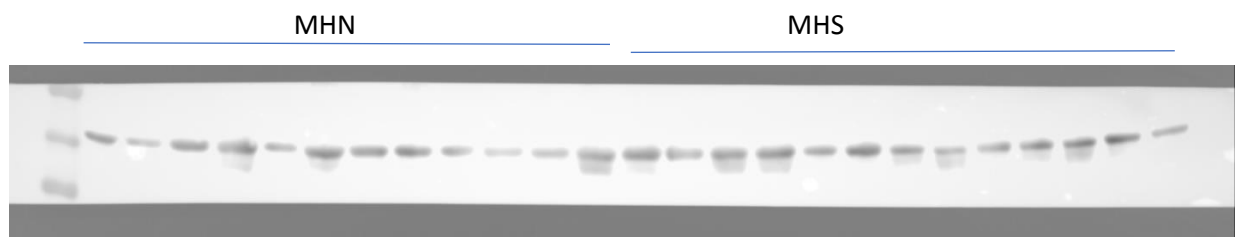

**Figure 1-source data 4:** Normalizing ponceau stain whole blot for JPh44 blot of figure 1B

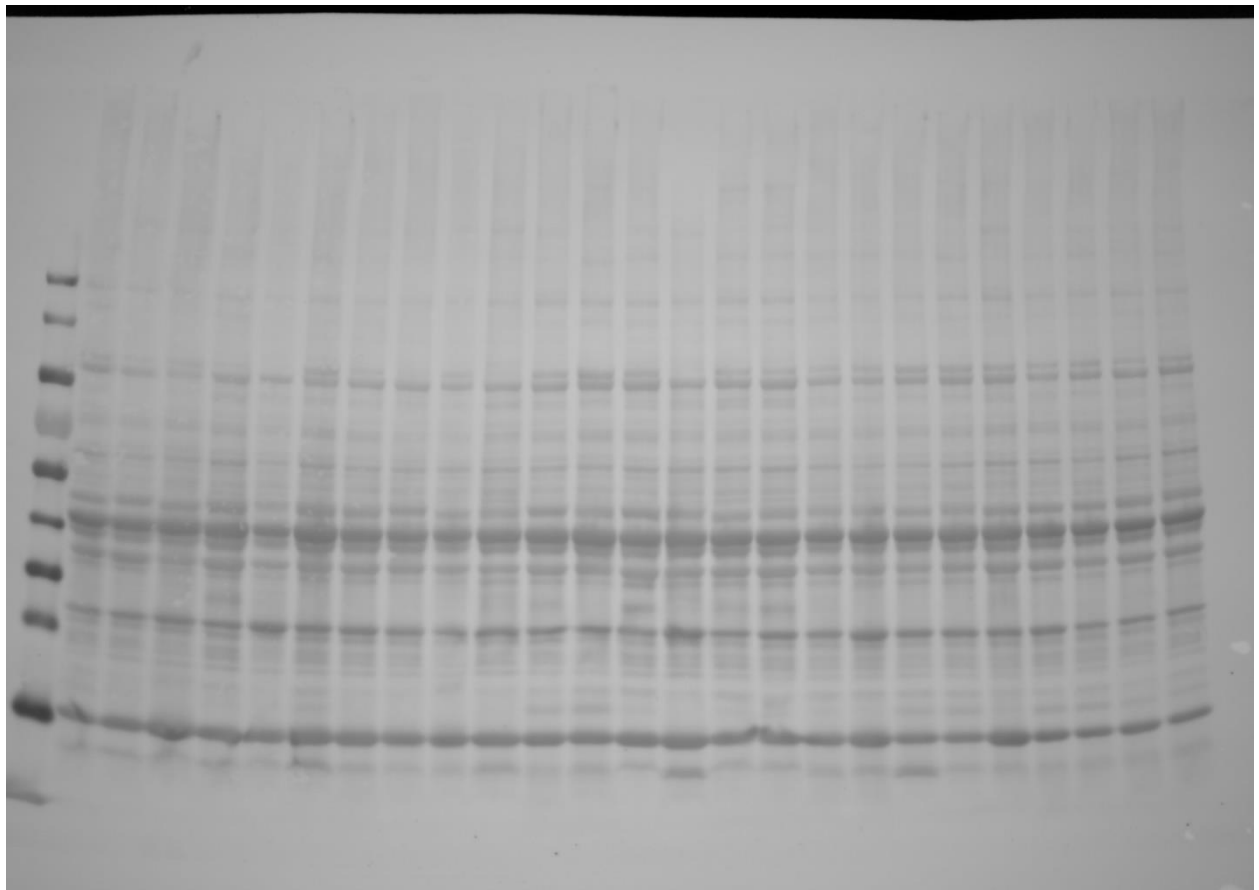

**Figure 1-source data 5:** GSK3b raw blot shown in Fig 1F

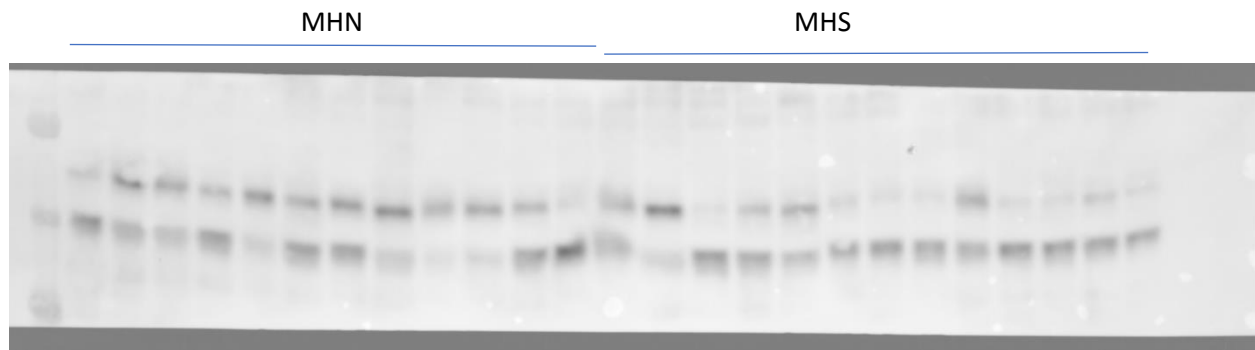

**Figure 1-source data 6:** Normalizing ponceau stain whole blot for GSK3B blot of figure 1f

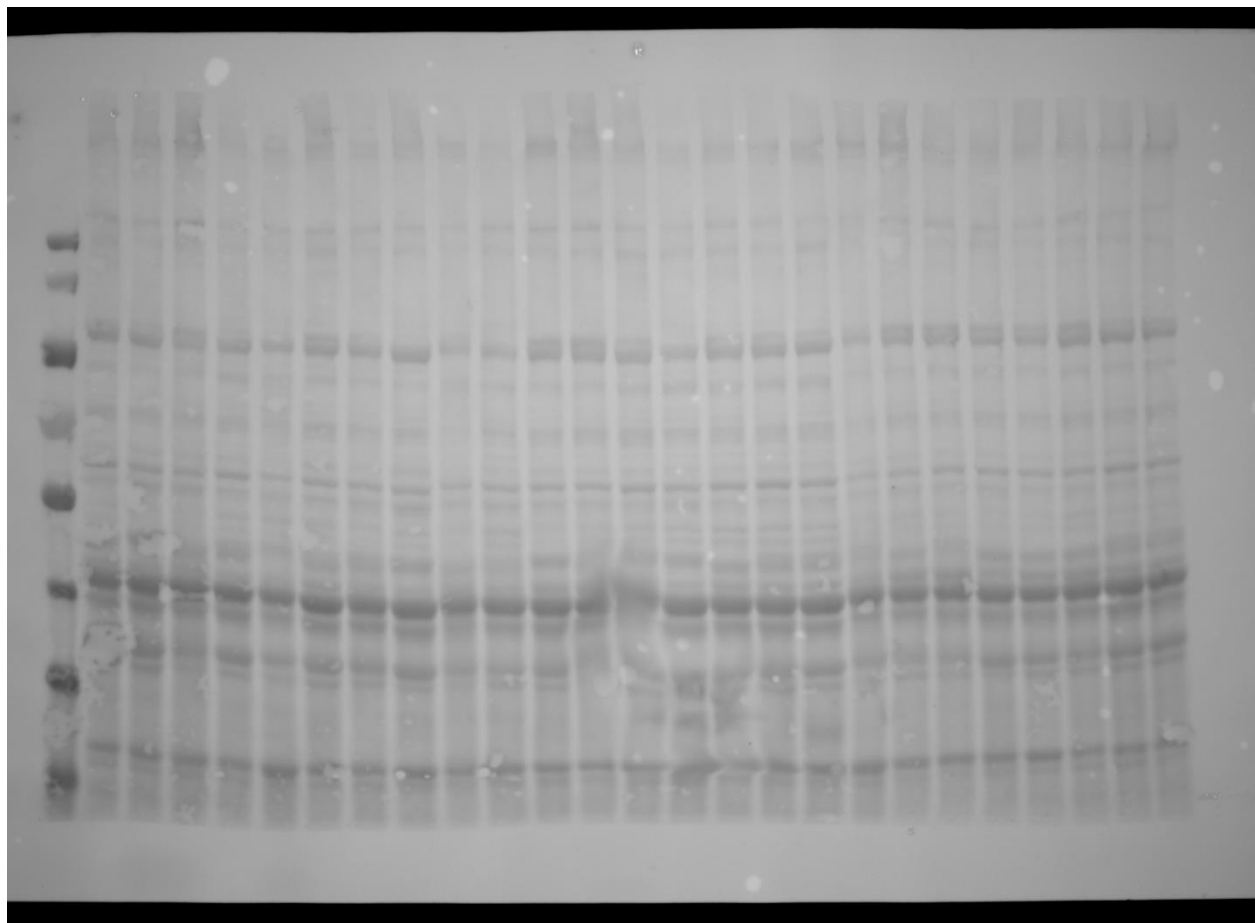

Supplement: fig1-data1 [file elife-78874-fig1-data1-v1.zip]
