# Supplementary material for: Muscle calcium stress cleaves junctophilin1, unleashing a gene regulatory program predicted to correct glucose dysregulation
Source: eLife journal article supplement (doi:10.7554/elife.78874), 2023-01-16

**Figure 1-figure supplement 1-source data 1:** following raw blot of JPh1 (abA) is used for Supplemental fig1 to fig. 1.

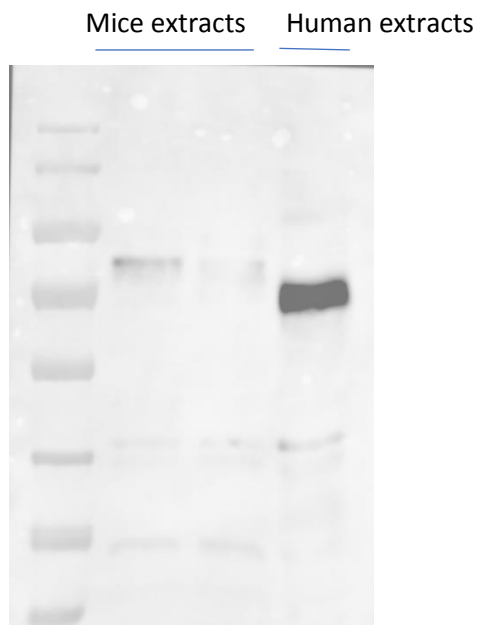

**Figure 1-figure supplement 1-source data 1:** Above blot is derived from right part of following ponceau stain membrane.

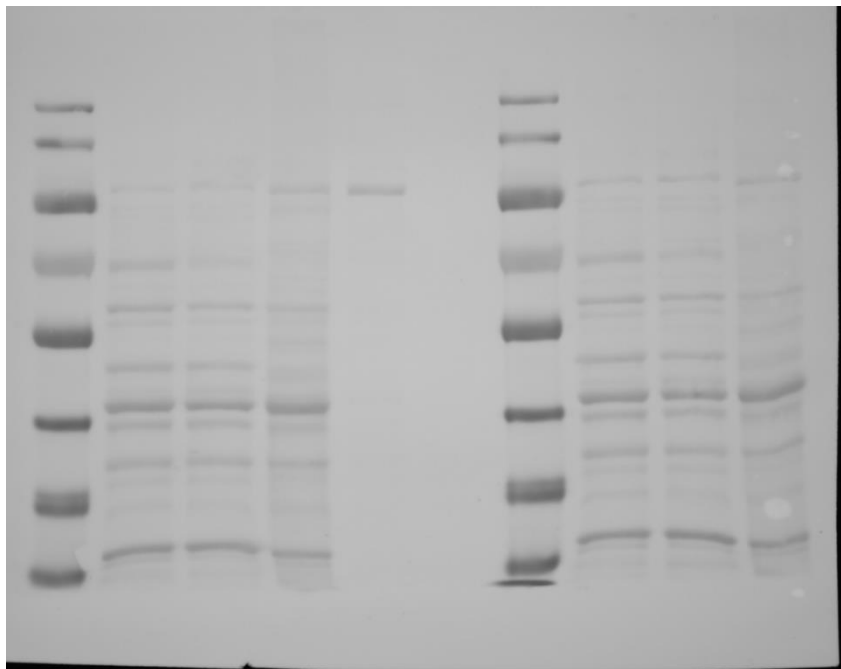

Supplement: fig1-figsupp1-data1 [file Annoted Figure 1 supplement 1 source data.pdf › Figure 1-figure supplement 1-source data 1/Annoted Figure 1 supplement 1 source data.pdf]
