# Supplementary material for: Muscle calcium stress cleaves junctophilin1, unleashing a gene regulatory program predicted to correct glucose dysregulation
Source: eLife journal article supplement (doi:10.7554/elife.78874), 2023-01-16

**Figure 4**

**Figure 4- source data 1:** Boxed region in below is shown as calpain blot for figure 4D. Lower part of the blot indicating autolyzed calpain fragments of small molecular weight is shown in supplement figure 2 to Figure 4.

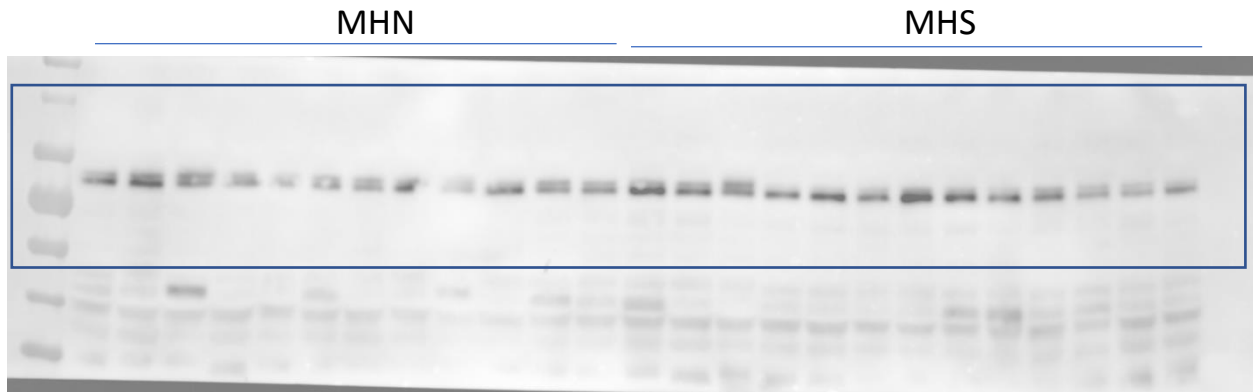

**Figure 4- source data 2:** Normalizing ponceau stain blot I for Calpain blot shown in figure 4D

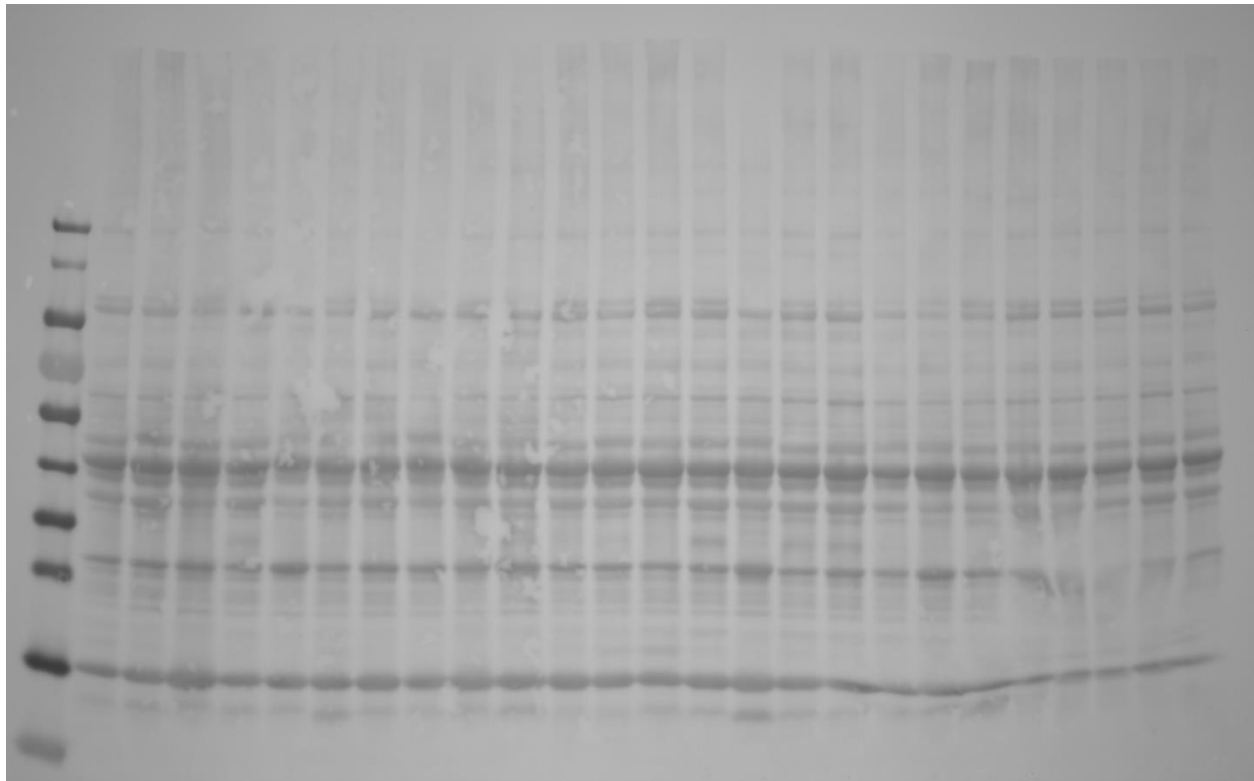

Supplement: fig4-data1 [file Annoted figure 4- source data.pdf › Figure 4- source data 1/Annoted figure 4- source data.pdf]
