# Supplementary material for: Muscle calcium stress cleaves junctophilin1, unleashing a gene regulatory program predicted to correct glucose dysregulation
Source: eLife journal article supplement (doi:10.7554/elife.78874), 2023-01-16
Supplement: fig4-figsupp2-data1 [file Annoted Figure 4-figure supplement 2 source data.pdf › Figure 4-figure supplement 2-source data 1/Annoted Figure 4-figure supplement 2 source data.pdf]

MHN MHS

This image shows a single, blank page from a spiral-bound notebook. The page is white and features faint horizontal ruling lines. A metal spiral binding is visible along the left edge of the page. There are some very light, blurry marks on the surface, possibly due to the scanning process or the age of the paper.
