# Supplementary material for: Muscle calcium stress cleaves junctophilin1, unleashing a gene regulatory program predicted to correct glucose dysregulation
Source: eLife journal article supplement (doi:10.7554/elife.78874), 2023-01-16

**Figure 5**

**Figure 5-source data 1:** JPh raw blot incubated with JPh abA shown in figure 5A

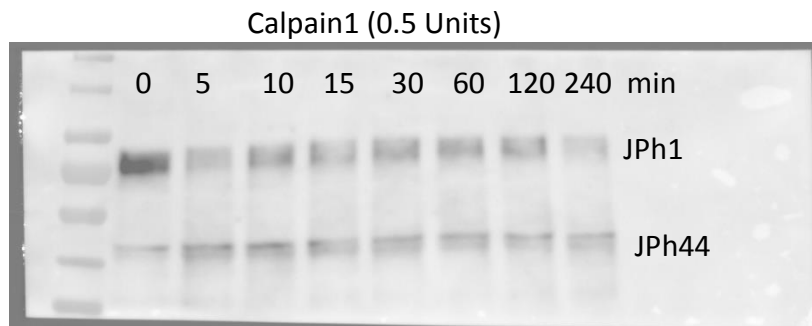

**Figure 5-source data 2:** Normalizing ponceau stain blot for JPh blot shown in figure 5A

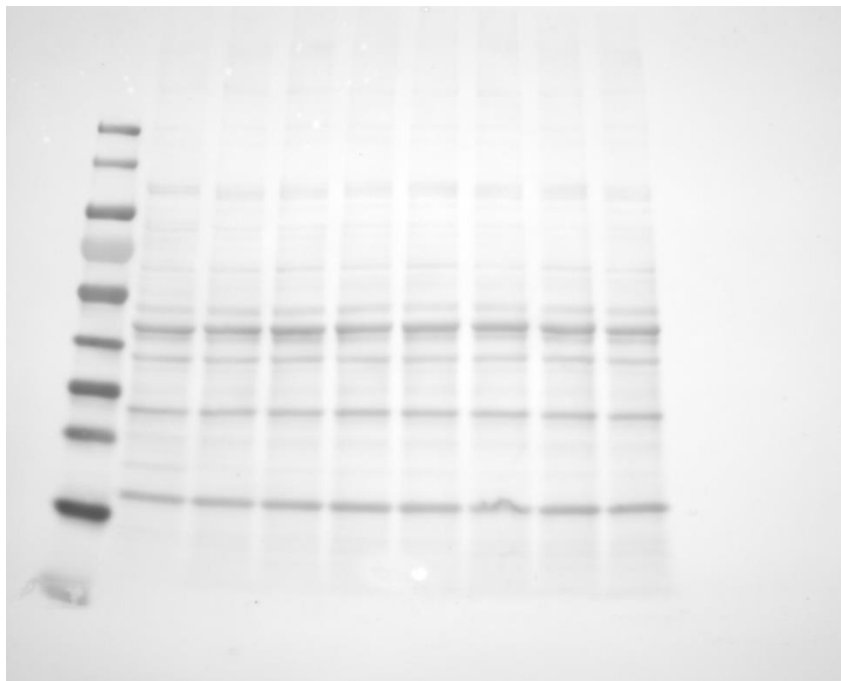

**Figure 5-source data 3:** Boxed area of following JPh1 blot is shown in figure 5C

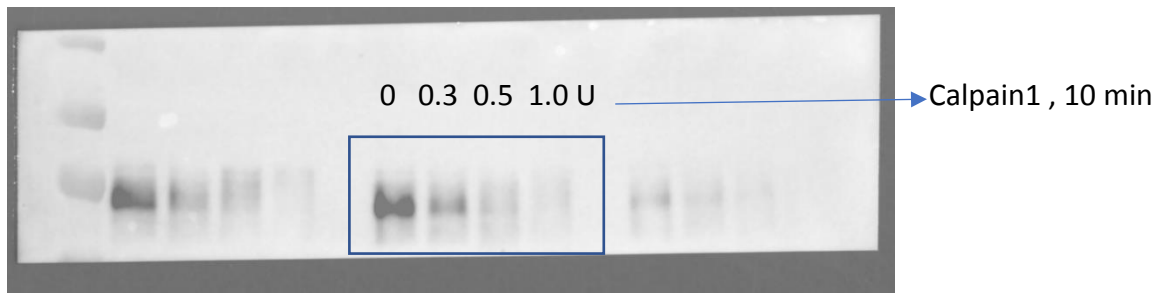

**Figure 5-source data 4:** Boxed area of following JPh44 blot is shown in figure 5C

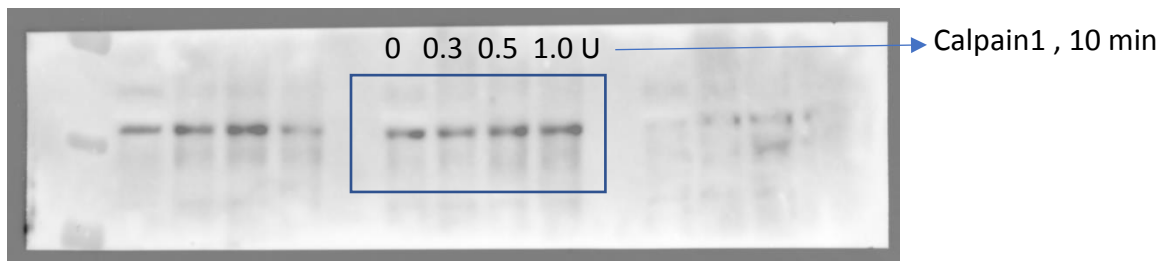

**Figure 5-source data 5:** Following normalizing ponceau stain blot is used for above figure shown in 5C

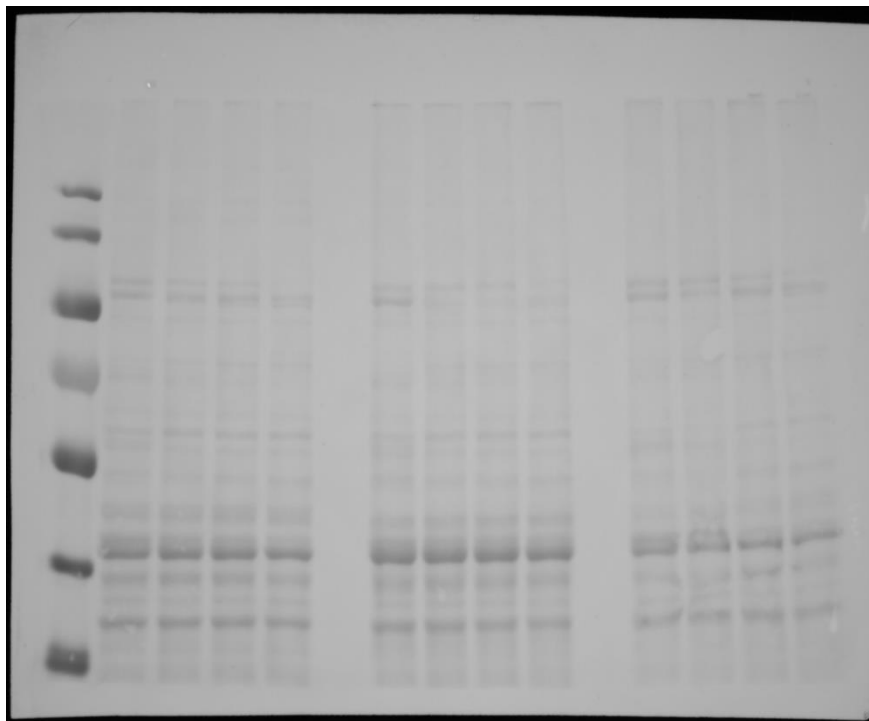

**Figure 5-source data 6:** Boxed area of following JPh1 blot is shown in figure 5E

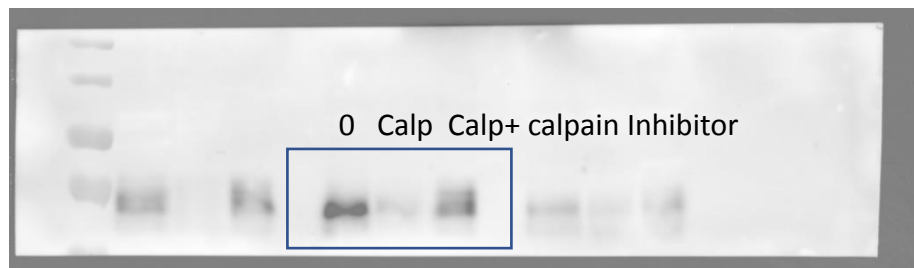

**Figure 5-source data 7:** Boxed area of following JPh44 blot is shown in figure 5E

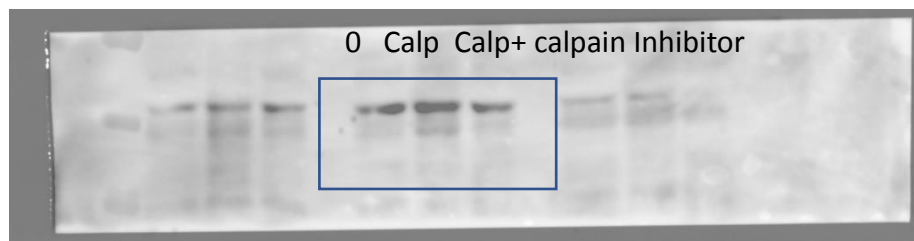

Following normalizing ponceau stain blot is used for above figure shown in 5E

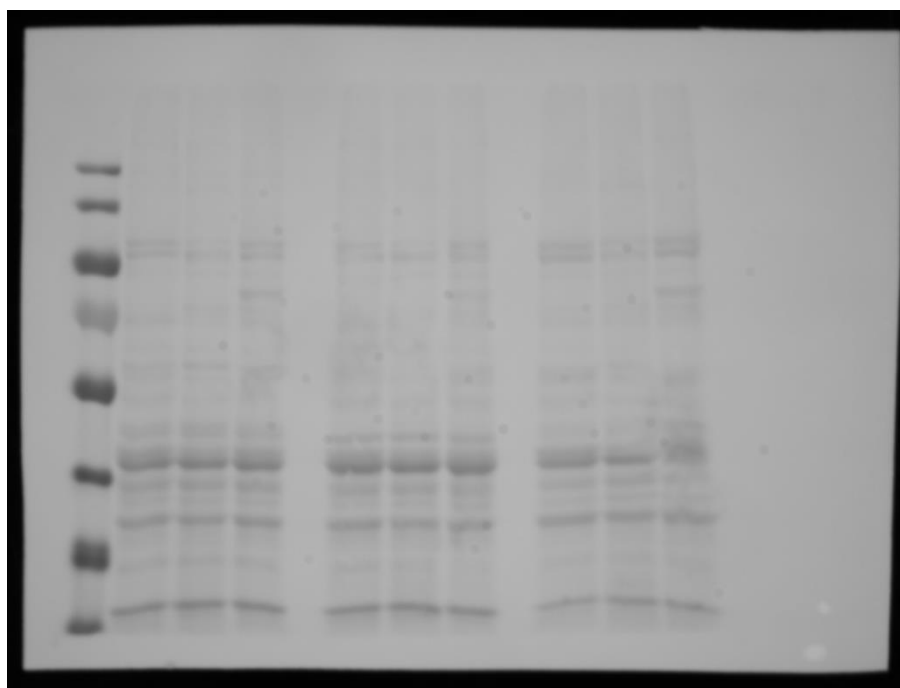

Supplement: fig5-data1 [file elife-78874-fig5-data1-v1.zip]
