# Supplementary material for: Muscle calcium stress cleaves junctophilin1, unleashing a gene regulatory program predicted to correct glucose dysregulation
Source: eLife. 2023 Feb 1;12:e78874. doi: 10.7554/eLife.78874 (PMC9891728; doi:10.7554/eLife.78874)
Supplement: Figure 8—source data 3. — GSK3B blot is derived from the left part and JPh from right part of the membrane. [file elife-78874-fig8-data3.zip]

Archive with 2 entries (2 files):
- Figure 8-source data 3/Annoted Figure 8- source data.pdf
- Figure 8-source data 3/Figure 8-source data 3.tif
